# Supplementary material for: Quantification of an effective charge injection barrier in non-fullerene-based organic photodetectors
Source: Royal Society of Chemistry journal article supplement (doi:10.1039/d2tc04958a), 2023-01-01
Supplement: d2tc04958a1.pdf [file d2tc04958a1.pdf]

Supporting Information

**Quantification of Effective Charge Injection Barrier in Non-Fullerene-Based Organic Photodetectors**

Yuting Chen,<sup>†</sup>Jingwen Li,<sup>†</sup>Yuan Xie, Yihui Chen, Hongbin Wu\*

Institute of Polymer Optoelectronic Materials and Devices, State Key Laboratory of

Luminescent Materials and Devices, South China University of Technology,

Guangzhou, 510640, P. R. China

\*E-mail: [hbwu@scut.edu.cn](mailto:hbwu@scut.edu.cn)

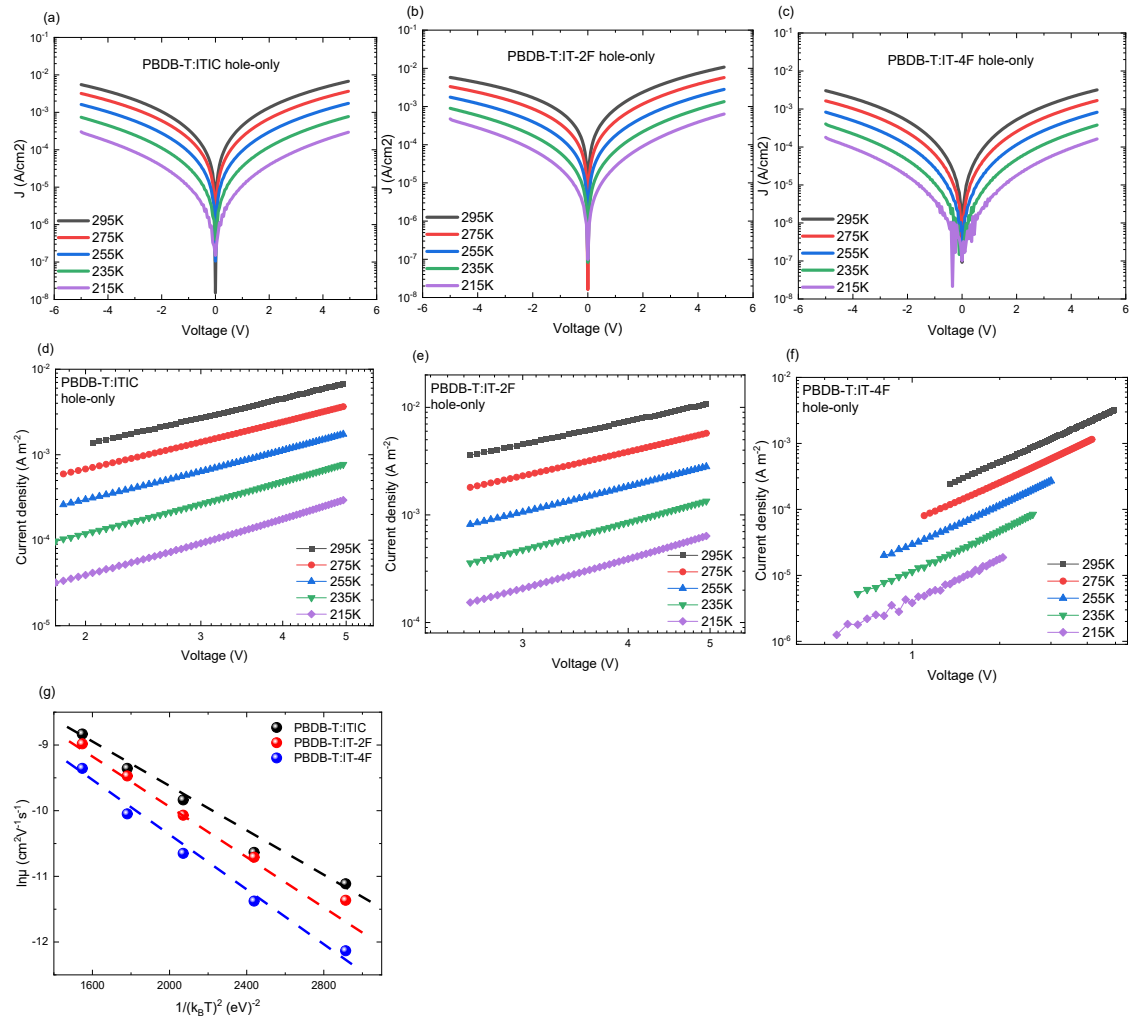

**Fig. S1** EGDM analysis on PBDB-T: ITIC, PBDB-T: IT-2F, and PBDB-T: IT-4F unipolar OPDs. Measured dark J-V characteristics for (a-c) hole-only OPDs with same active thickness at different temperatures, (d-f) The quadratic dependence of the current density on voltage. (g) The temperature dependence of  $\mu$  in a  $\ln(j_0/\mu)$  versus  $1/(K_B T)^2$ .

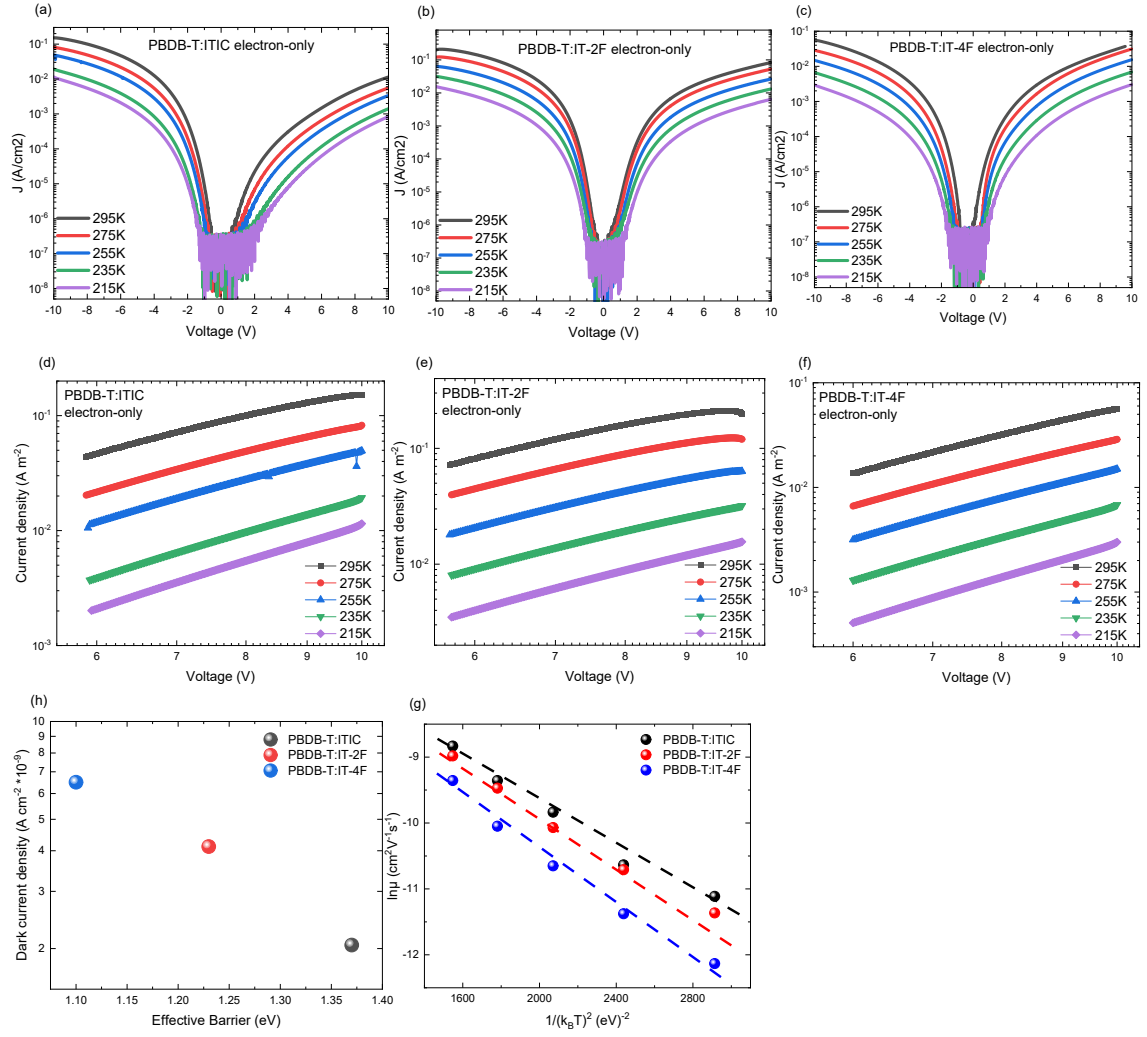

**Fig. S2** EGDM analysis on PBDB-T: ITIC, PBDB-T: IT-2F, and PBDB-T: IT-4F single-carrier devices. (a-c) The dark  $J$ - $V$  characteristics for the electron-only device.

(d-f) The quadratic dependence of the current density on voltage. (g) The temperature

dependence of  $\mu$  in a  $\ln(j_{00})(\mu)$  versus  $1/(K_B T)^2$ . (h) The dependence of dark current on

the effective injection barrier.

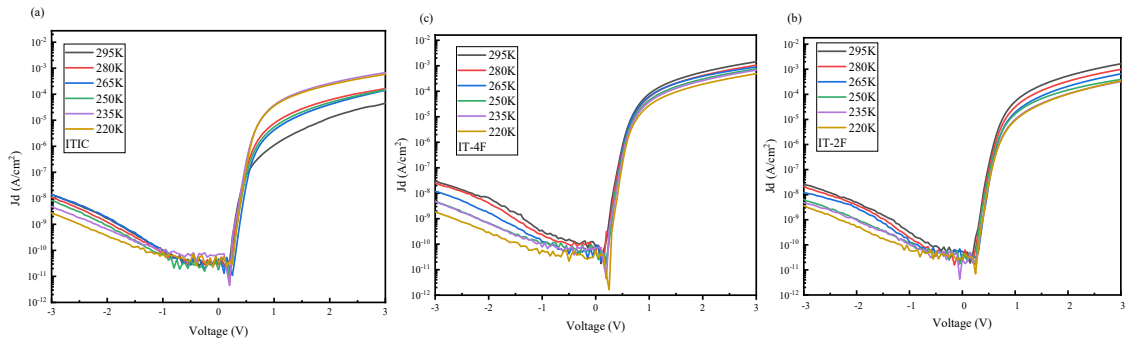

**Fig. S3** The dark  $J$ - $V$  characteristics as a function of temperature for the PBDB-T:ITIC, PBDB-T:IT-2F, and PBDB-T:IT-4F devices.
